# Supplementary material for: Effect of Solution Treatment Time on Microstructure Evolution and Properties of Mg-3Y-4Nd-2Al Alloy
Source: MDPI journal article supplement (doi:10.3390/ma16062512), 2023-03-22
Supplement: s1 [file s1]

# Supporting Information

## Effect of Solution Treatment Time on Microstructure

### Evolution and Properties of Mg-3Y-4Nd-2Al Alloy

Lili Zhao<sup>1,2,3</sup>, Sicong Zhao<sup>1,2,\*</sup>, Yicheng Feng<sup>1,2</sup>, Lei Wang<sup>1,2</sup>, Rui Fan<sup>1,2</sup>, Tao Ma<sup>1,2</sup> and Liping Wang<sup>1,2,\*</sup>

<sup>1</sup>*School of Material Science and Chemical Engineering, Harbin University of Science and Technology, Harbin 150000, China*

<sup>2</sup>*Key Laboratory of Advanced Manufacturing and Intelligent Technology (Ministry of Education), Harbin University of Science and Technology, Harbin 150000, China*

<sup>3</sup>*College of Light Industry, Harbin University of Commerce, Harbin, 150028, Heilongjiang, China*

\*Correspondence: zscwr@163.com (S.Z.); lp\_wang2003@126.com (L.W.)

#### The EDS results

As shown in Figure S1, the total amount of RE elements in the matrix of as-cast alloy is 0.25 at%, and the total amount of RE elements in the matrix after the solution treatment is 0.62 at%. Thus, the solid solute elements in the matrix increased after the solution treatment.

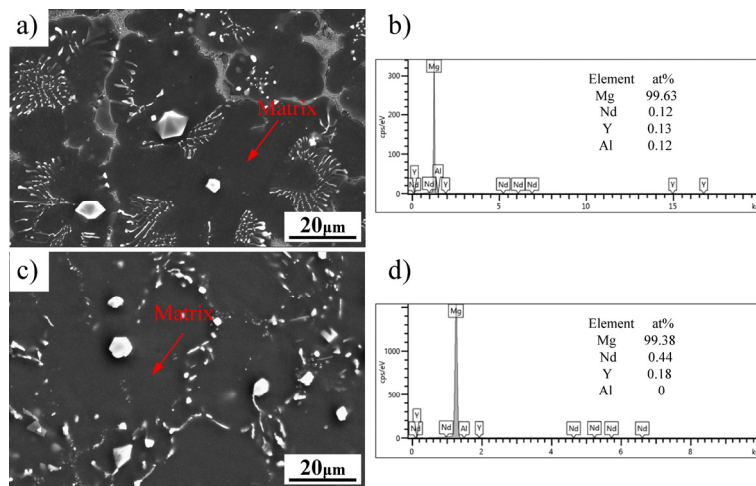

Figure S1. SEM and EDS results of  $\alpha$ -Mg matrix, a) and b) as-cast alloy; c) and d) solution-treated alloy.
